# Supplementary material
Source: PubMed Central journal article supplement (PMC9345892)
Supplement: 41416_2022_1814_MOESM1_ESM.pdf [file 41416_2022_1814_MOESM1_ESM.pdf]

**Supplementary Table 1. List of primers used in RT-PCR**

| <b>Genes</b>        | <b>Forward primer sequence</b> | <b>Reverse primer sequence</b> |
|---------------------|--------------------------------|--------------------------------|
| Mouse <i>Ang1</i>   | 5'-ctcatcgaagtggacaggca-3'     | R-5'-agcgaatggaagccctaca-3'    |
| Mouse <i>Cd31</i>   | 5'-acactatgtggactggcagtggtt-3' | 5'-tgaggctcgattgttcagctgcta-3' |
| Mouse <i>Cdh5</i>   | 5'-tcaacgcatctgtccagagat-3'    | 5'-cacgatttggtacaagacagtg-3'   |
| Mouse <i>Mmp2</i>   | 5'-caaggatggactcctggcacat-3'   | 5'-tactcgccatcagcgttcccat-3'   |
| Mouse <i>Mmp3</i>   | 5'-ctctggaacctgagacatcacc-3'   | 5'-aggagtctgagagatttgcgc-3'    |
| Mouse <i>Mmp9</i>   | 5'-gctgactacgataaggacggca-3'   | 5'-tagtggtgcaggcagagtagga-3'   |
| Mouse <i>Col1a2</i> | 5'-ttctgtgggtcctgctgggaaa-3'   | 5'-ttgtcacctcggatgccttgag-3'   |
| Mouse <i>Gapdh</i>  | 5'-ctaccccaatgtgtccgtc-3'      | 5'-gttgctgttgaagtcgcaa-3'      |
| Human <i>GAPDH</i>  | 5'-gaaggtgaaggtcggagt -3'      | 5'-gaagatggtgatgggatttc -3'    |
| Human <i>ANG</i>    | 5'-agaagcgggtgagaaacaa-3'      | 5'-ctccaacacaggctcctcg-3'      |
| Human <i>CD24</i>   | 5'-tgctcctaccacgcaga-3'        | 5'-ggccaaccagagttggaa-3'       |
| Human <i>MMP9</i>   | 5'-ttgacagcgacaagaagtgg-3'     | 5'-gccattcacgtcgtccttat-3'     |
